# Supplementary material for: Label-free and sensitive detection of uracil-DNA glycosylase using exponential real-time rolling circle amplification
Source: Royal Society of Chemistry journal article supplement (doi:10.1039/c8ay00742j), 2018-01-01
Supplement: c8ay00742j1.pdf [file c8ay00742j1.pdf]

## Supporting Information for

### **Label-free and sensitive detection of Uracil-DNA glycosylase using exponential real-time rolling circle amplification**

Yuan Xu, Yun-Xi Cui, Qiu-Ge Zhao, An-Na Tang\*, and De-Ming Kong\*

*State Key Laboratory of Medicinal Chemical Biology, Tianjin Key Laboratory of  
Biosensing and Molecular Recognition, Collaborative Innovation Center of Chemical  
Science and Engineering, College of Chemistry, Nankai University, Tianjin, 300071,  
PR China*

Submitted to **Analytical Methods**, April. 02, 2018

---

\* Correspondence: Dr. An-Na Tang, College of Chemistry, Nankai University, 94 Weijin Road,

Tianjin, 300071, P. R. China

E-mail: tanganna@nankai.edu.cn

Fax: +86-22-23500938

Dr. De-Ming Kong, College of Chemistry, Nankai University, 94 Weijin Road, Tianjin, 300071, P. R.

China

E-mail: kongdem@nankai.edu.cn

Fax: +86-22-23502458

## 1. HP<sub>L</sub>/Padlock complex with a base bulge

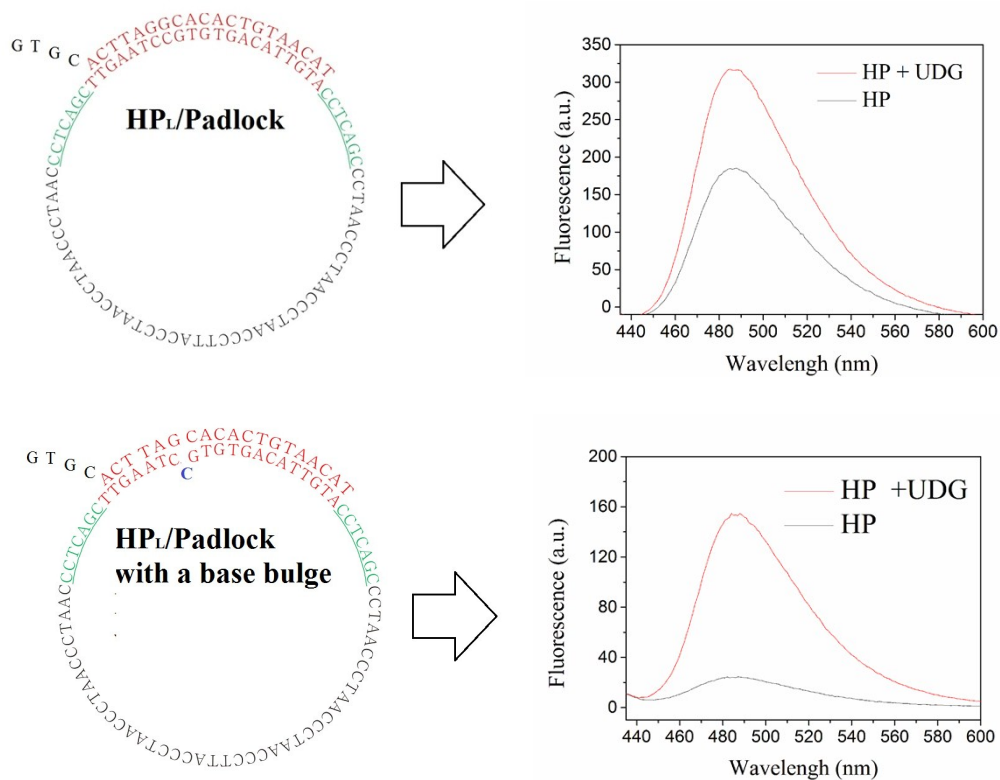

**Scheme S1.** Comparison of HP<sub>L</sub>/Padlock complexes without or with a base bulge. (Left), Schematic representation of HP<sub>L</sub>/Padlock complexes; (Right) Fluorescence signals given by corresponding UDG-sensing systems.

## 2. Optimization of exponential RCA-based UDG-sensing platform

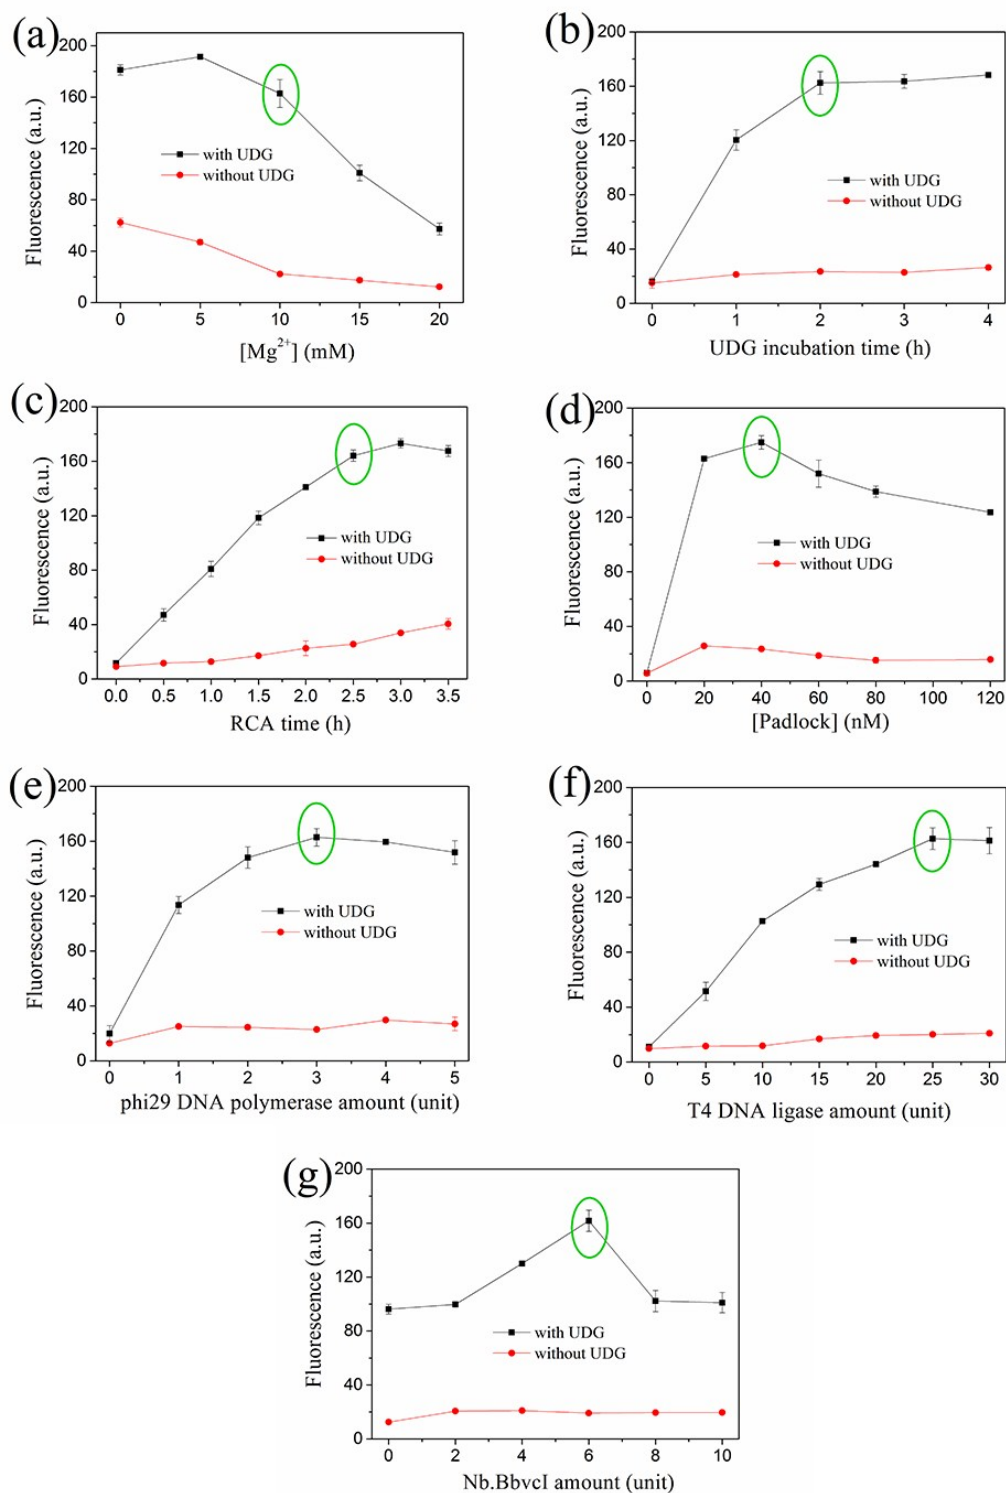

**Fig. S1.** Optimization of  $Mg^{2+}$  concentration (a), UDG incubation time (b), RCA reaction time (c), **Padlock** concentration (d) amounts of phi29 DNA polymerase (e), T4 DNA ligase (f) and Nb.BbvCI (g) in exponential RCA-based UDG-sensing system. The data were expressed as mean  $\pm$   $\sigma$  (n=3).

### 3. Linear RCA-based UDG-sensing platform

#### 3.1 Optimization of experimental conditions

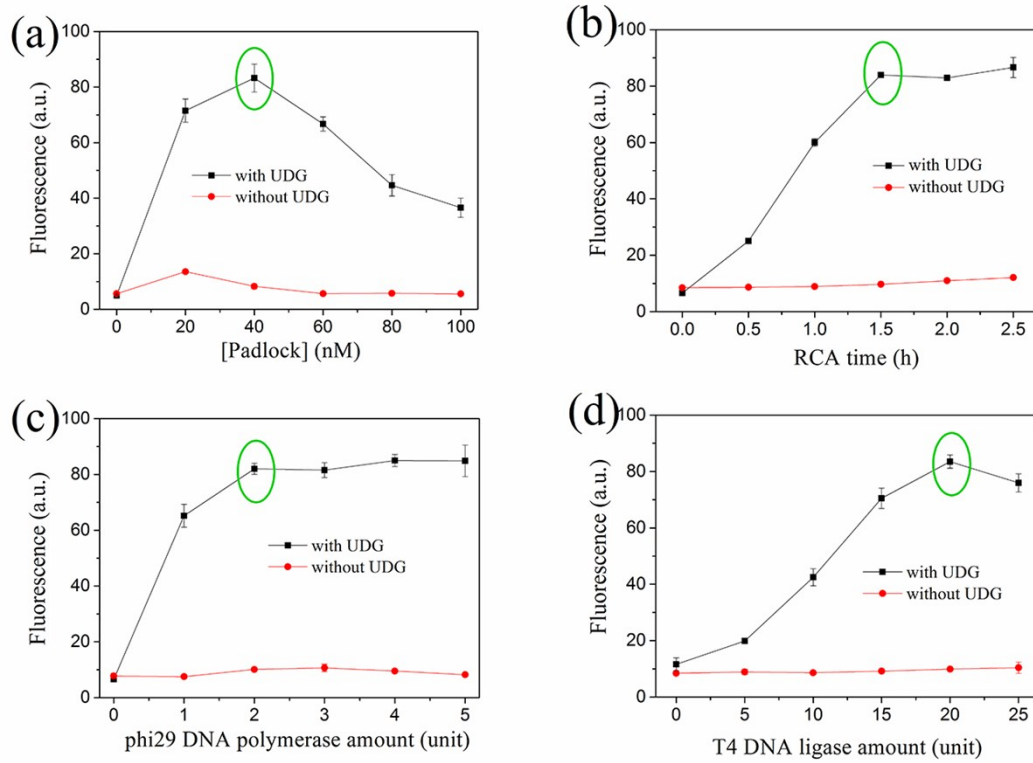

**Fig. S2.** Optimization of **Padlock** concentration (a), RCA reaction time (b), amounts of phi29 DNA polymerase (c) and T4 DNA ligase (d) in linearly amplified RCA-based UDG-sensing system. The data were expressed as mean  $\pm$   $\sigma$  (n=3).

### 3.2 UDG activity detection using linear RCA-based sensing platform

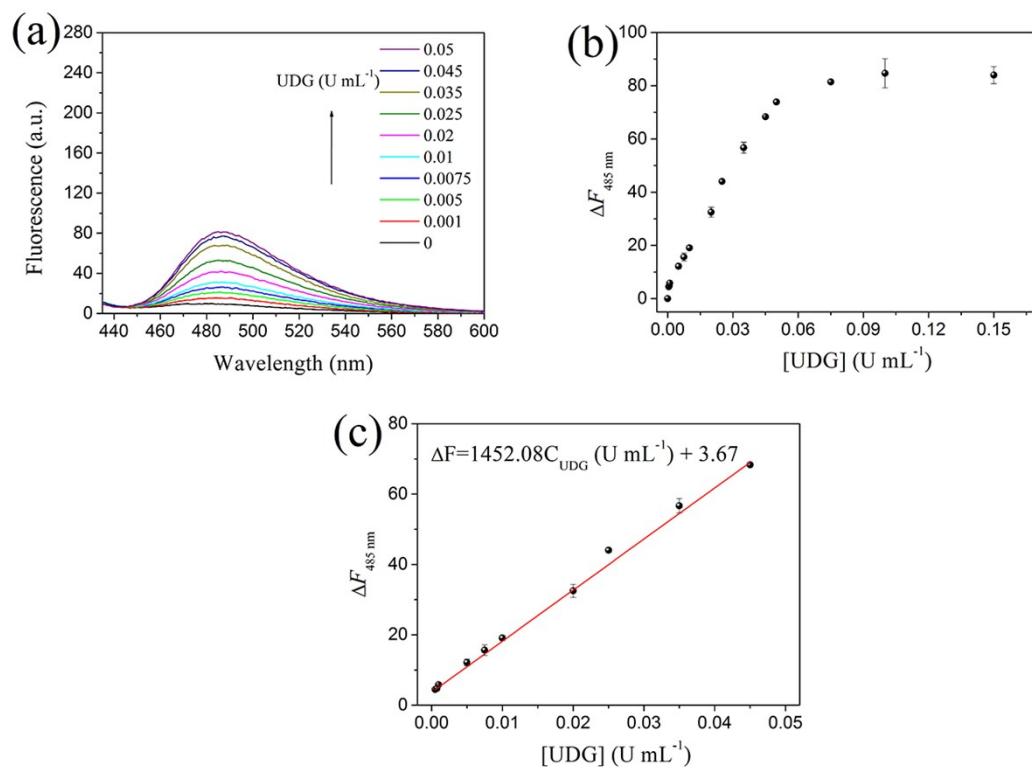

**Fig. S3.** UDG activity detection by linear RCA-based sensing platform. (a) Fluorescence spectra of the sensing systems containing different concentrations of UDG. (b) UDG activity-dependent fluorescence intensity change ( $\Delta F$ ) at 485 nm. (c) The linear relationship between  $\Delta F$  and UDG concentration in the range of  $1 \times 10^{-3} \sim 0.045$  U mL<sup>-1</sup>. The data were expressed as mean  $\pm$   $\sigma$  (n=3).

#### 4. Comparison of our method with other reported ones

**Table S1.** Detection limits and real sample applications of some UDG detection methods

| Method       | System                                                             | Detection limit (U mL <sup>-1</sup> ) | Real sample application               | Reference |
|--------------|--------------------------------------------------------------------|---------------------------------------|---------------------------------------|-----------|
| Colorimetric | Formation of a G-quadruplex–cofactor complex                       | 0.008                                 | Not given                             | [12]      |
| Colorimetric | Nicking enzyme assisted chain replace amplification                | 0.02                                  | Not given                             | [13]      |
| Luminescent  | UDG assisted pyridinium luminescent switch-on molecular probe      | 0.005                                 | Diluted serum samples with spiked UDG | [14]      |
| Fluorescence | Enzyme-assisted bicyclic cascade signal                            | 0.0001                                | Cell extract                          | [16]      |
| Fluorescence | Intrinsically fluorescent nucleotides                              | 0.0025                                | Cell extract                          | [17]      |
| Fluorescence | Inserted fluorescence probe                                        | 0.0008                                | Cell extract                          | [18]      |
| Fluorescence | Synthesis a G-quadruplex probe                                     | 0.02                                  | Not given                             | [19]      |
| Fluorescence | Real time monitoring uracil excision via labeled molecular beacons | 0.005                                 | Cell extract with spiked UDG          | [21]      |
| Fluorescence | Real-time strand displacement amplification                        | 6×10 <sup>-5</sup>                    | Cell extract                          | [25]      |
| Fluorescence | Real-time exponential RCA                                          | 5.5×10 <sup>-5</sup>                  | Cell extract                          | This work |
